# Supplementary material for: Junctional Adhesion Molecule-Like Protein Promotes Tumor Progression and Metastasis via p38 Signaling Pathway in Gastric Cancer
Source: Front Oncol. 2021 Mar 11;11:565676. doi: 10.3389/fonc.2021.565676 (PMC7991718; doi:10.3389/fonc.2021.565676)
Supplement: Supplementary file 1 [file DataSheet_1.xlsx]

## Sheet: Sheet1
Clinicopathological parameters and JAML expression of patients with gastric cancer
Patient No.	Gender	Age	T	N	M	G(Histological grade)	TNM	JAML expression score in tumor tissues	JAML expression score in peritumoral tissues	JAML expression level (0, low ; 1, high )
1	male	77	1a	0	0	2	1a	2	1	0
2	female	60	1a	0	0	2	1a	3	4	0
3	male	67	1b	0	0	2	1a	3	8	0
4	male	61	1b	0	0	2	1a	3	4	0
5	male	79	2	0	0	2	1b	3	6	0
6	male	65	2	0	0	2	1b	3	0	0
7	male	60	2	0	0	2	1b	2	0	0
8	male	64	2	0	0	2	1b	3	2	0
9	male	53	2	0	0	3	1b	0	0	0
10	male	43	2	0	0	3	1b	4	0	1
11	male	68	2	0	0	3	1b	12	6	1
12	male	65	2	0	0	3	1b	12	0	1
13	male	49	2	0	0	3	1b	12	3	1
14	male	88	2	0	0	3	1b	8	3	1
15	male	66	2	0	0	3	1b	2	6	0
16	male	64	2	0	0	3	1b	9	4	1
17	female	56	2	0	0	3	1b	4	0	1
18	female	77	2	0	0	3	1b	8	3	1
19	female	73	1b	1	0	3	1b	6	2	1
20	male	76	2	0	0	2	1b	6	2	1
21	male	46	2	0	0	2	1b	6	4	1
22	male	75	2	1	0	2	2a	3	2	0
23	male	55	2	1	0	2	2a	2	6	0
24	male	82	2	1	0	3	2a	2	3	0
25	male	56	2	1	0	3	2a	1	1	0
26	male	61	2	1	0	3	2a	0	0	0
27	male	69	2	1	0	3	2a	12	2	1
28	male	67	2	1	0	3	2a	4	2	1
29	male	83	3	0	0	2	2a	8	2	1
30	female	75	2	1	0	2	2a	1	2	0
31	male	60	2	1	0	2	2a	6	6	1
32	male	73	2	2	0	2	2b	4	4	1
33	male	68	3	1	0	3	2b	6	3	1
34	male	61	2	2	0	3	2b	6	2	1
35	male	49	2	2	0	3	2b	4	1	1
36	male	60	2	2	0	3	2b	4	2	1
37	female	60	2	2	0	3	2b	8	8	1
38	male	60	2	2	0	3	2b	4	6	1
39	male	68	2	2	0	3	2b	2	2	0
40	male	60	2	2	0	2	2b	3	1	0
41	male	59	2	3a	0	2	3a	3	0	0
42	male	81	2	3a	0	2	3a	3	1	0
43	female	46	4b	0	0	3	3a	6	6	1
44	male	51	4b	0	0	3	3a	12	4	1
45	male	70	3	2	0	3	3a	4	4	1
46	male	67	2	3a	0	3	3a	4	4	1
47	female	50	2	3a	0	3	3a	6	2	1
48	female	36	2	3a	0	3	3a	4	0	1
49	female	74	2	3a	0	3	3a	6	2	1
50	male	66	2	3a	0	3	3a	4	4	1
51	male	72	2	3a	0	3	3a	6	6	1
52	female	72	2	3a	0	3	3a	8	3	1
53	female	68	2	3a	0	2	3a	2	6	0
54	female	57	2	3a	0	2	3a	8	12	1
55	male	62	3	2	0	2	3a	8	0	1
56	male	73	3	2	0	2	3a	6	6	1
57	male	55	2	3a	0	2	3a	6	3	1
58	female	43	4b	2	0	3	3b	4	0	1
59	male	67	3	3a	0	3	3b	6	2	1
60	male	63	3	3a	0	3	3b	6	0	1
61	male	61	2	3b	0	3	3b	8	12	1
62	male	61	3	3a	0	2	3b	9	6	1
63	male	81	2	3b	0	2	3b	9	0	1
